# Supplementary material for: Direct interaction of TrkA/CD44v3 is essential for NGF-promoted aggressiveness of breast cancer cells
Source: PubMed Central journal article supplement (PMC8962522; doi:10.1186/s13046-022-02314-4), 2022-03-28
Supplement: 13046_2022_2314_MOESM3_ESM.pdf [file 13046_2022_2314_MOESM3_ESM.pdf]

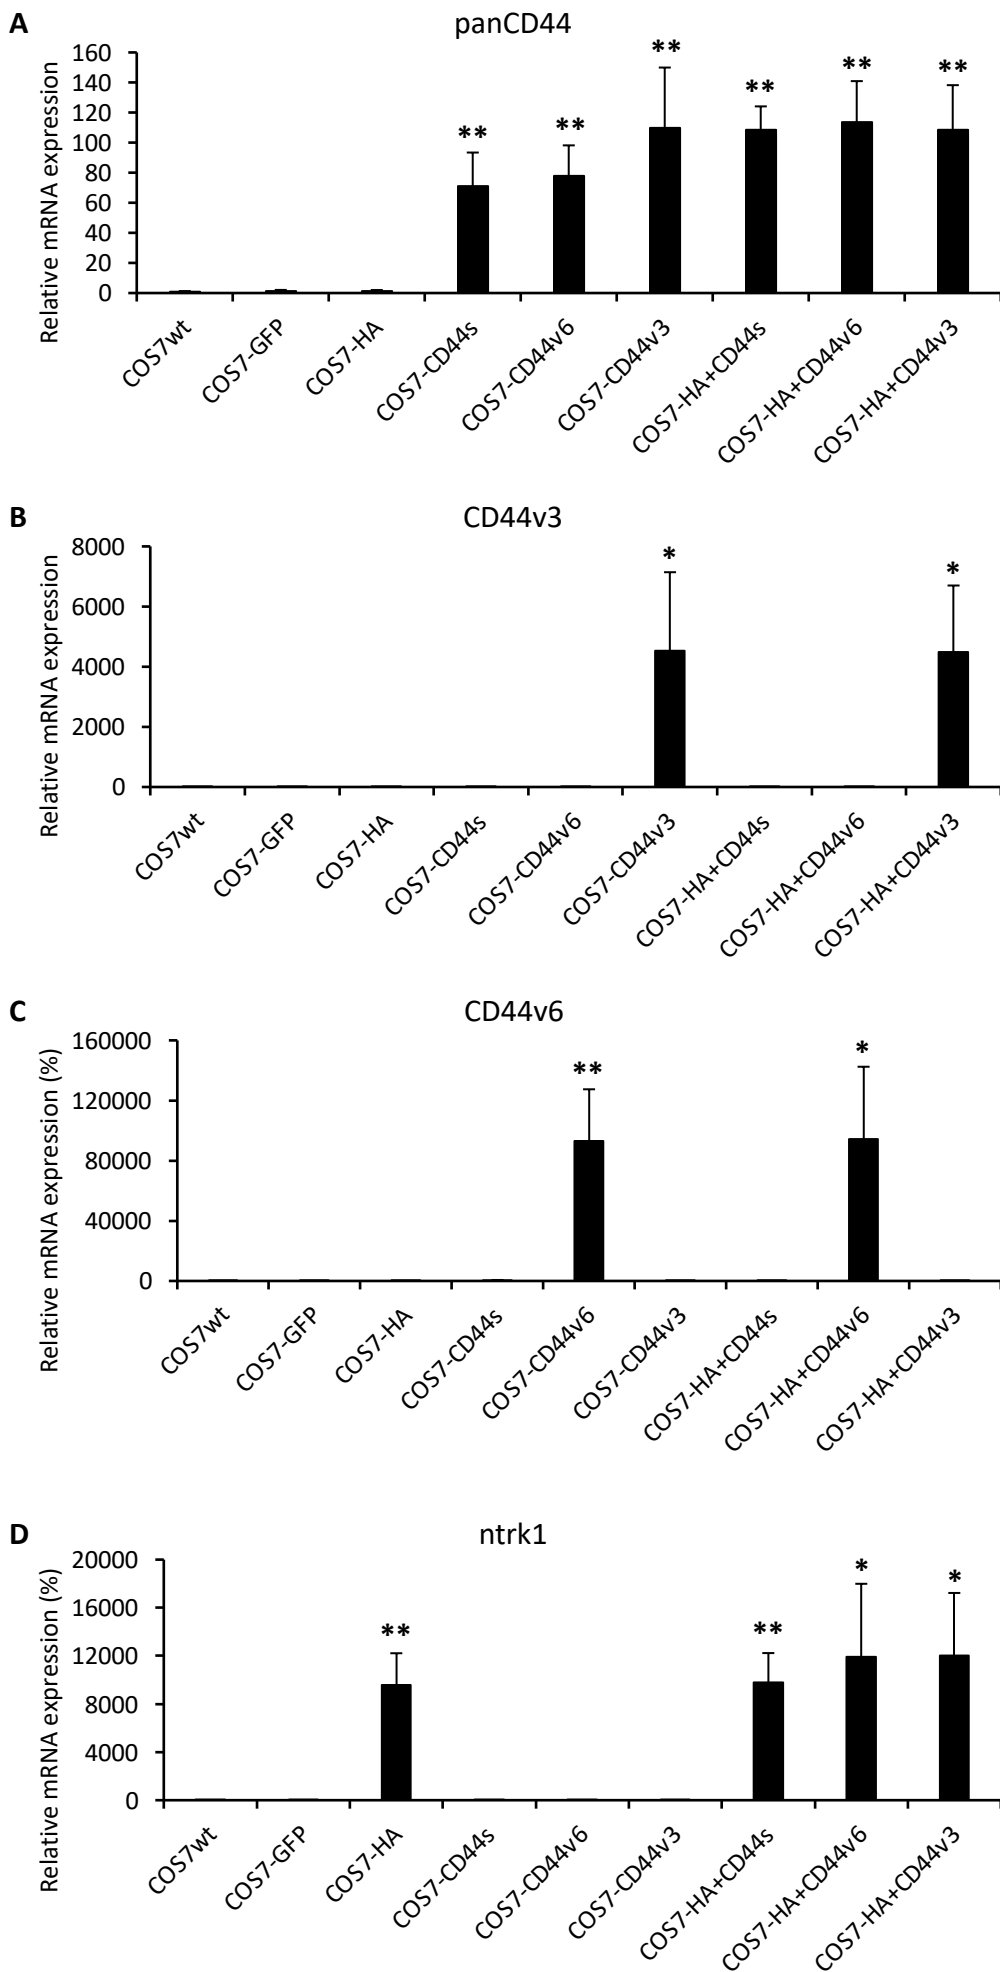

Figure Supp 1, Trouvilliez *et al.*

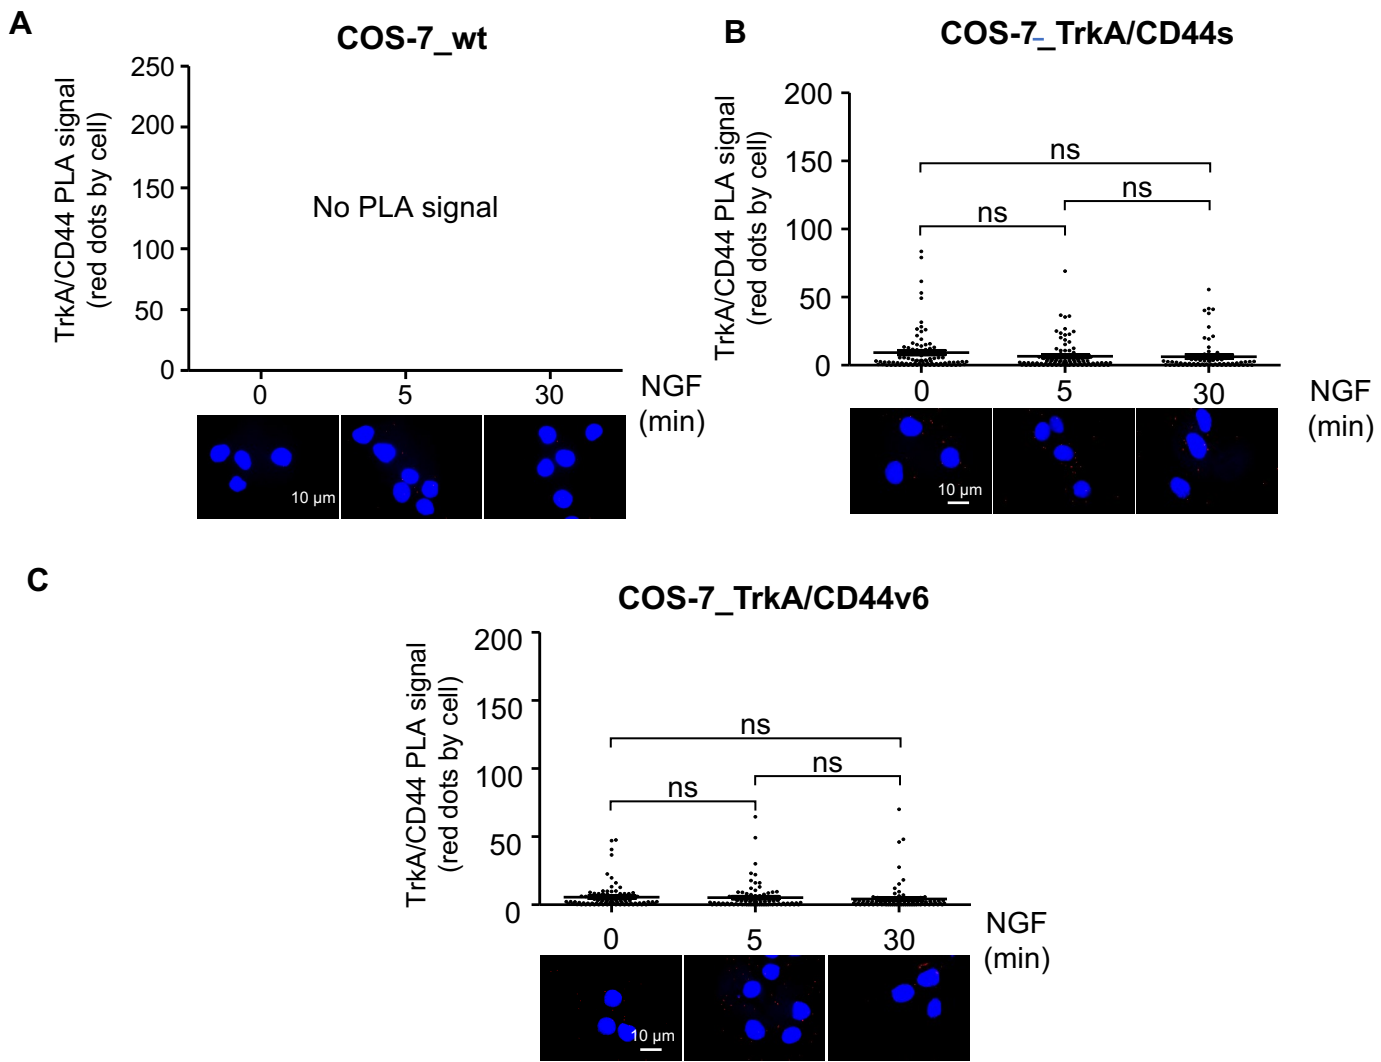

Figure Supp 2, Trouvilliez *et al.*

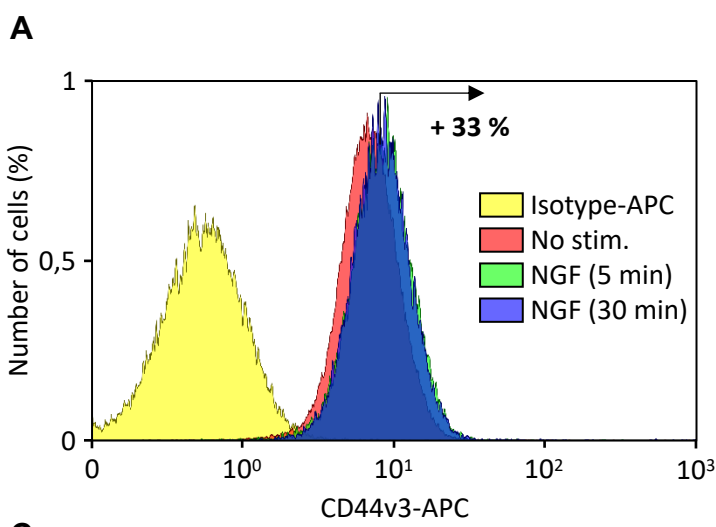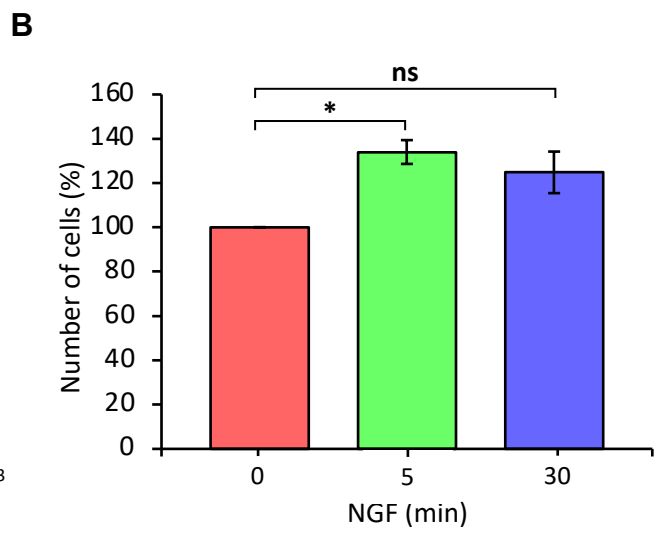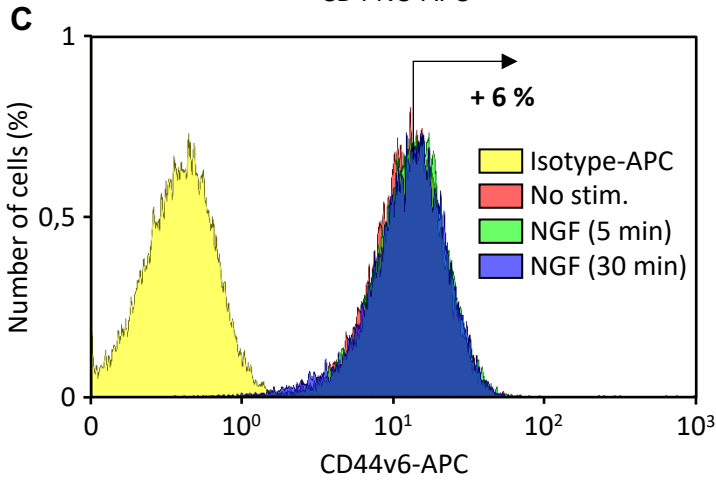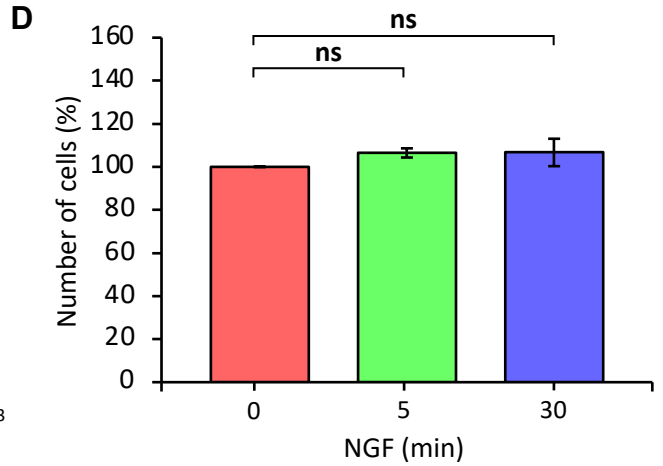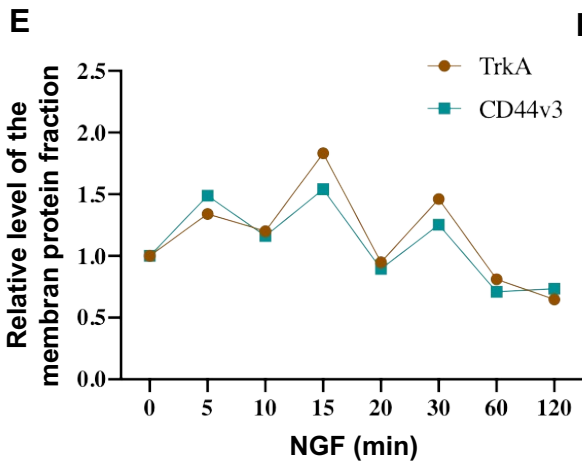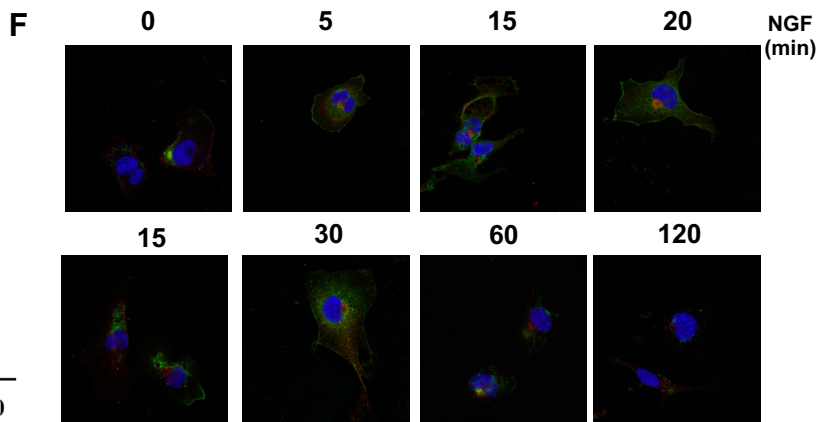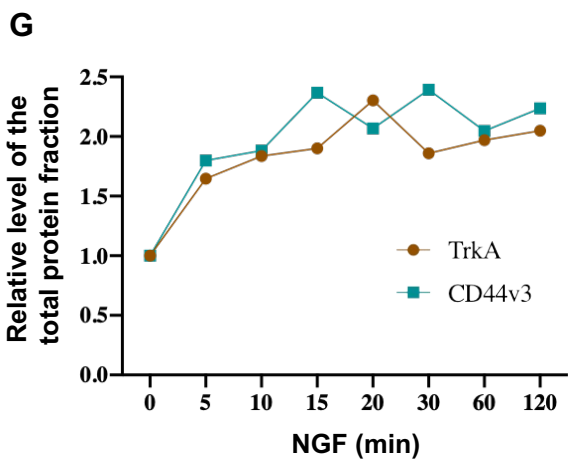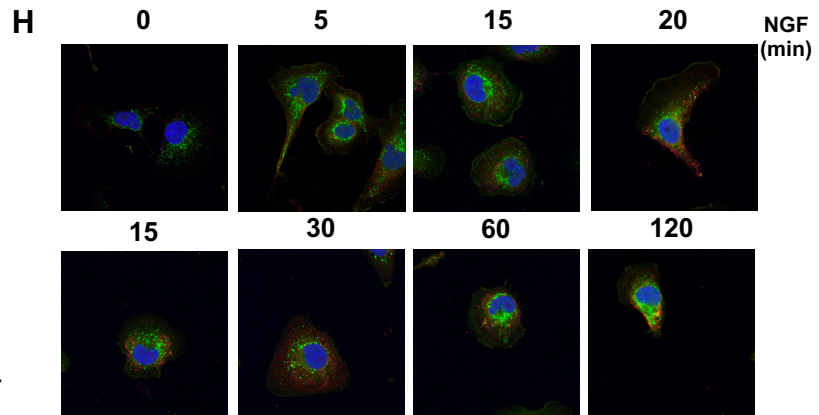

Figure Supp 3, Trouvilliez *et al.*

### CD 44 His V3 VS

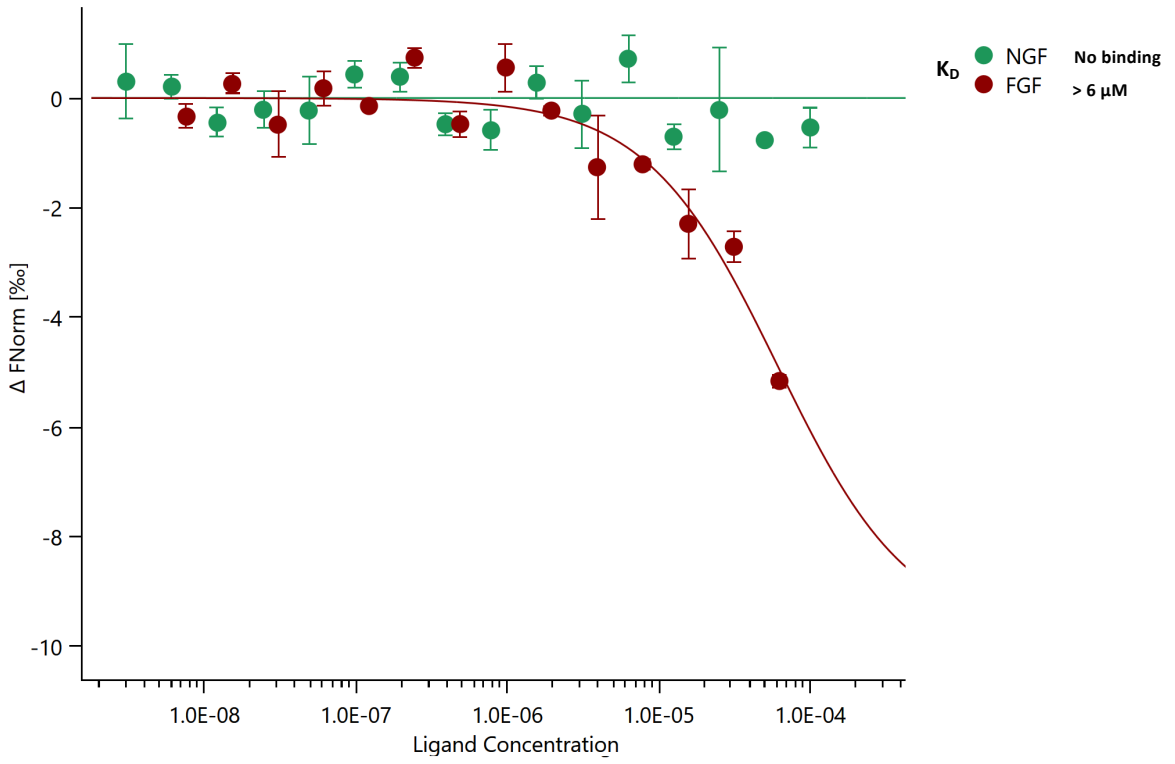

Figure Supp 4, Trouvilliez *et al.*

**A**

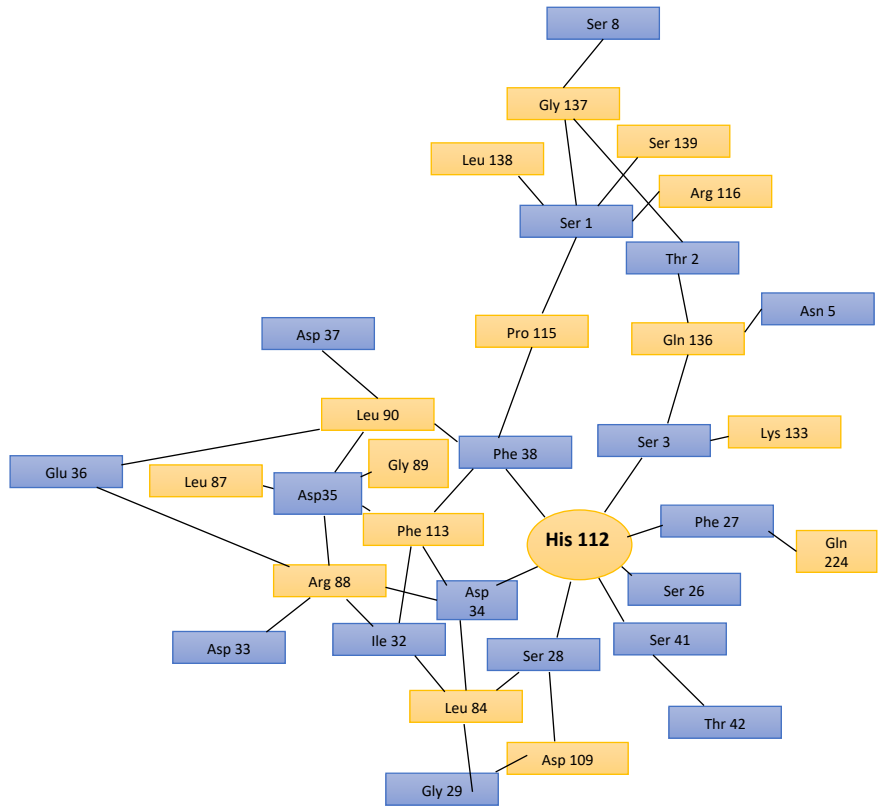

**B**

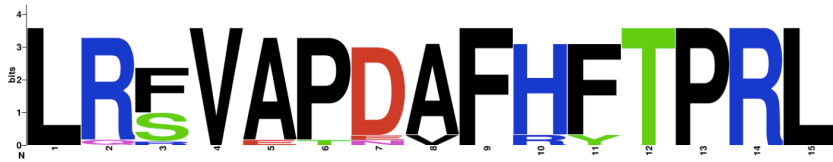

**C**

↓

```

tr|A0A1U7R5Y5|A0A1U7R5Y5_MESAU SLTIVKSLRSVAPDAFHFTTPRLSHLNLSSNALESLSWKTQVGLSLQNLTVSGNPLLCSC
sp|P35739|NTRK1_RAT sp|P35739|NTRK1_RAT SLTIVKSLRFVAPDAFHFTTPRLSHLNLSSNALESLSWKTQVGLSLQDLTLGSLGNPLHCSC
sp|Q3UFB7|NTRK1_MOUSE SLTIVKSLRFVAPDAFHFTTPRLSHLNLSSNALESLSWKTQVGLSLQDLTLGSLGNPLHCSC
tr|H0V0A7|H0V0A7_CAVPO NLTIVKSLRFVAPDAFHFTTPRLSRLNLSFNLDLESLSWRAVQGLSLQELVLSGNPLRCSC
tr|G1SZT9|G1SZT9_RABIT tr|G1SZT9|G1SZT9_RABIT NLAIVNSLQSVATDAFHFTTPRLSHLNLSSNALESLSWKTQVGLPLQELVLSGNLRCSC
XP_008153851.1 NLTIVNSQLRVEPDAFHFTTPRLRRLNLSFNALSLSWKTQVGLSLQELVLSGNPLRCSC
sp|P04629|NTRK1_HUMAN NLTIVKSLRFVAPDAFHFTTPRLSRLNLSFNALSLSWKTQVGLSLQELVLSGNPLHCSC
tr|A0A2I3T3D1|A0A2I3T3D1_PANTR NLTIVKSLRFVAPDAFHFTTPRLSRLNLSFNALSLSWKTQVGLSLQELVLSGNPLHCSC
tr|F7DJ75|F7DJ75_MACMU NLTIVKSLRFVAPDAFHFTTPRLSRLNLSFNALSLSWKTQVGLSLQELVLSGNPLHCSC
tr|W5P907|W5P907_SHEEP GPTIVKSLRSVAPDAFHFTTPRLSRLNLSFNALSLSWKTQVGLSLQELVLSGNPLHCSC
tr|A0A452FSF7|A0A452FSF7_CAPHI KLTIVKSLRSVAPDAFHFTTPRLSRLNLSFNALSLSWKTQVGLSLQELVLSGNPLHCSC
XP_002686012.2 KLTIVKSLRSVAPDAFHFTTPRLSRLNLSFNALSLSWKTQVGLSLQELVLSGNPLHCSC
tr|F1RHK6|F1RHK6_PIG NLTIVKSLRFVAPDAFHFTTPRLSRLNLSFNALSLSWKTQVGLSLQELVLSGNPLHCSC
XP_022415255.1 NLTIVKSLRFVAPDAFHFTTPRLRRLDLSFNALSLSWKTQVGLSLQELVLSGNPLHCCTC
XP_015103644.1 NLTIVKSLRFVAPDAFHFTTPRLRRLNLSFNALSLSWKTQVGLSLQELVLSGNPLHCSC
tr|A0A337SML4|A0A337SML4_FELCA GLTIVKSLRFVAPDVFHFTTPRLSRLNLSFNALSLSWKTQVGLSLQELVLSGNPLRCSC
XP_023103311.1 GLTIVKSLRFVAPDVFHFTTPRLSRLNLSFNALSLSWKTQVGLSLQELVLSGNPLRCSC
tr|F6XBZ5|F6XBZ5_CANLF DLTIVKSLRSVAPDAFHFTTPRLRRLNLSFNALSLSWKTQVGLPLQELVLSGNPLHCSC
XP_022276948.1 DLTIVKSLRSVAPDAFHFTTPRLRRLNLSFNALSLSWKTQVGLPLQELVLSGNPLHCSC
:::***: * :.:***: :*: * * :***: :*: * * :*

```

**E**

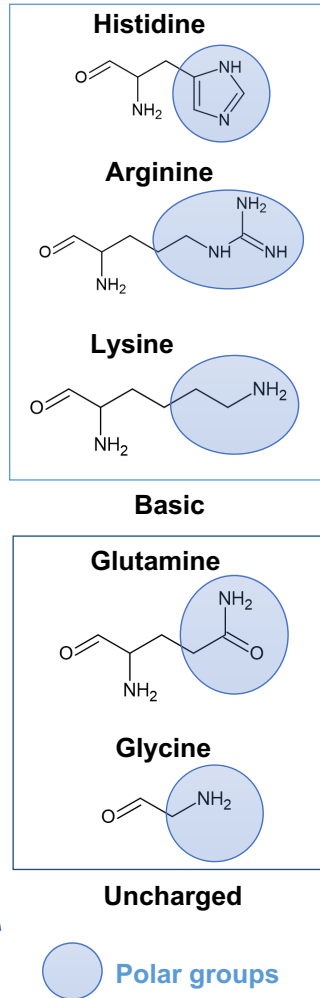

**D**

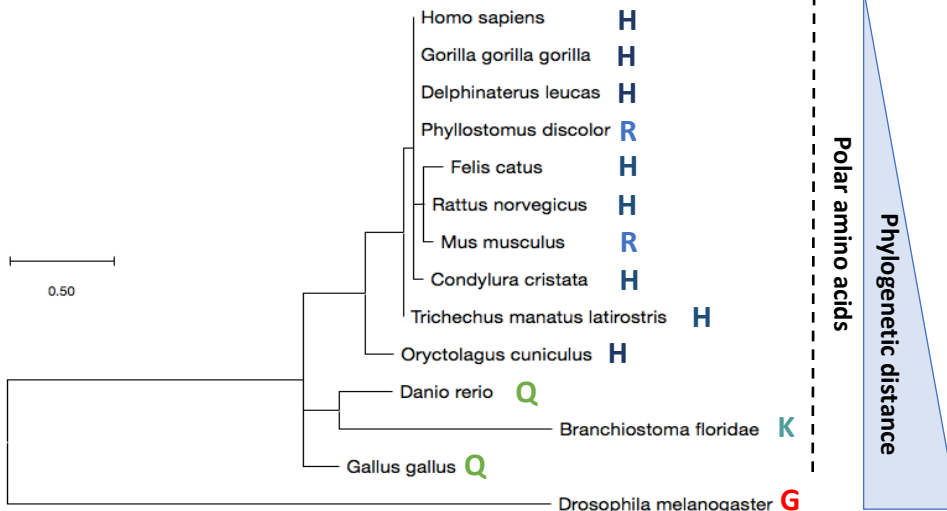

### A TrkA + SP

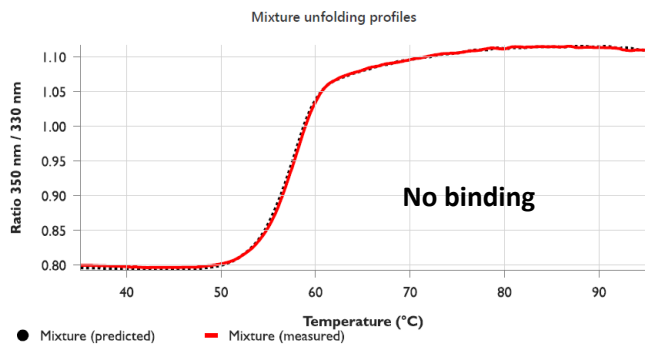

### B TrkA + P4

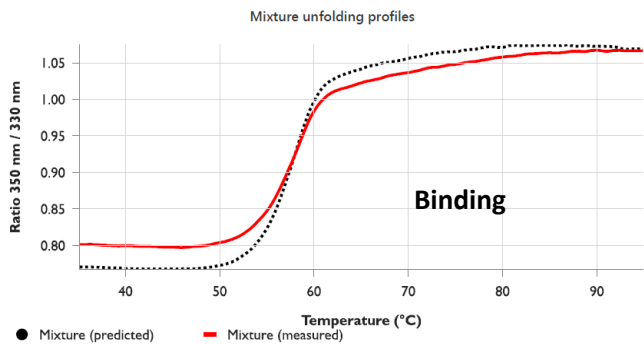

### C COS-7 CD44v3 + P4

Signal to Noise Ratio:

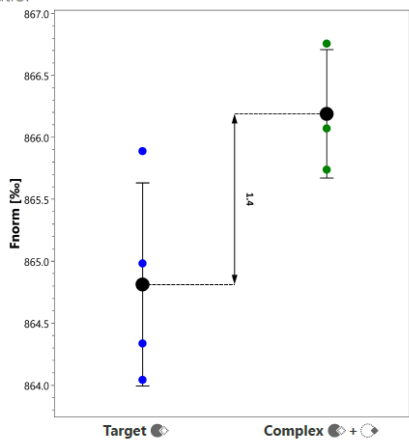

Response Evaluation:  
 Response: 865  
 Noise: 0.8  
 Response Amplitude: 1.4  
 Signal to Noise Ratio: 2.1

No binding

# MDA-MB-231

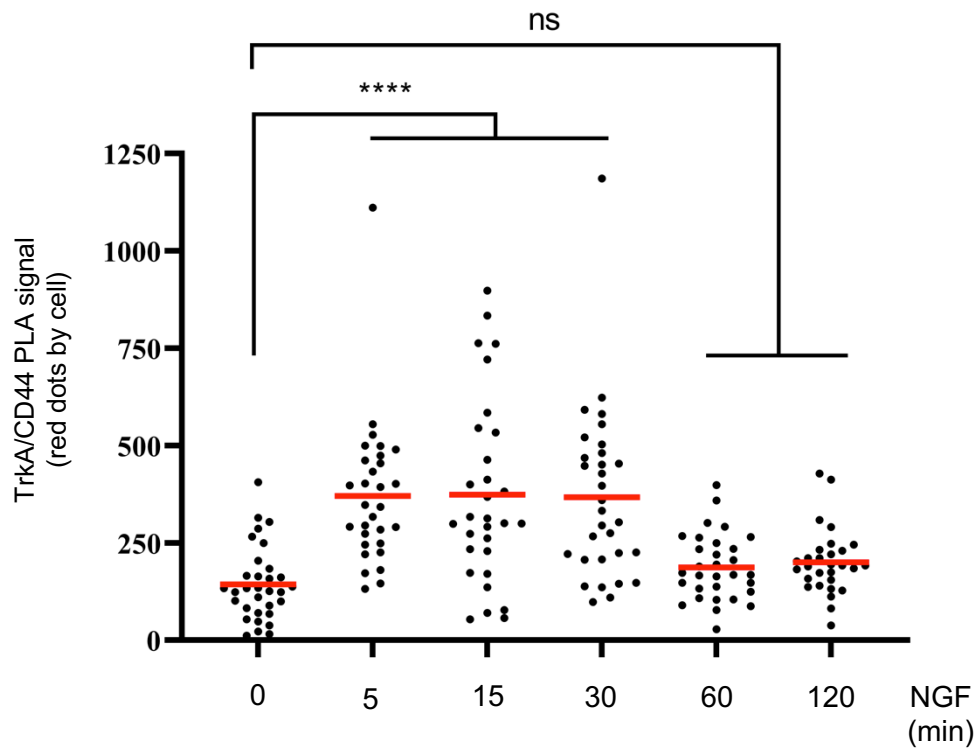

Figure Supp 7, Trouvilliez *et al.*

**A**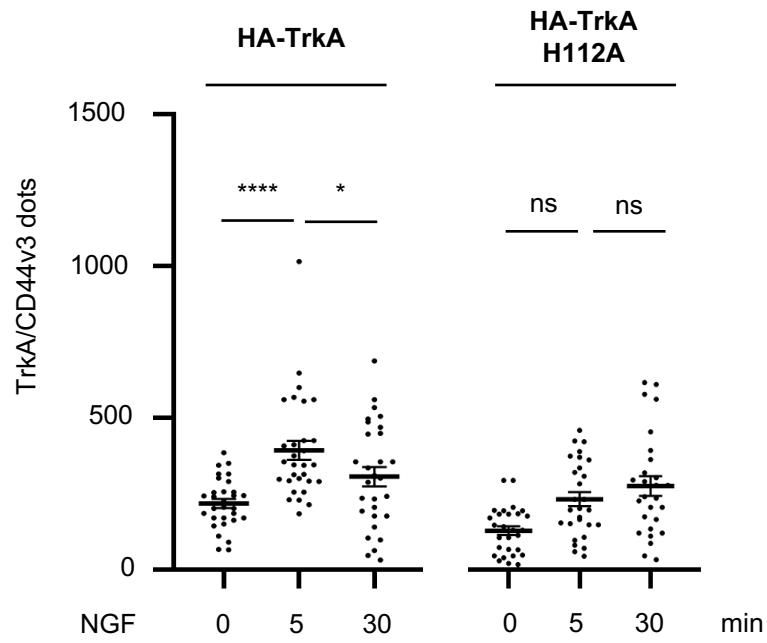**B**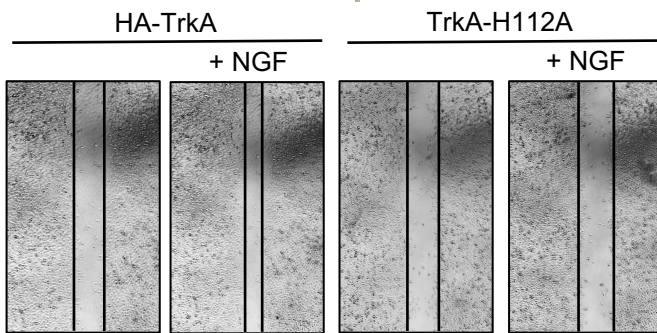**C**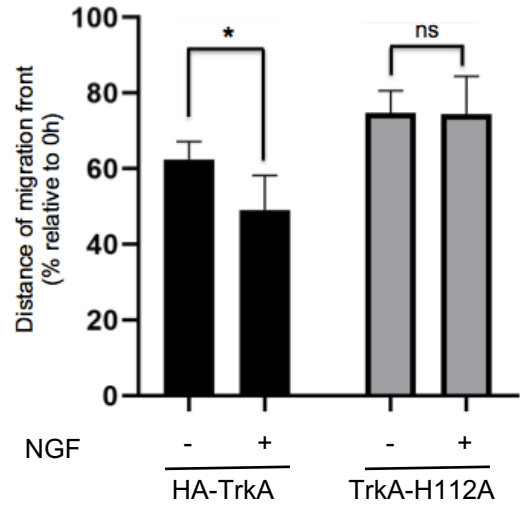**D**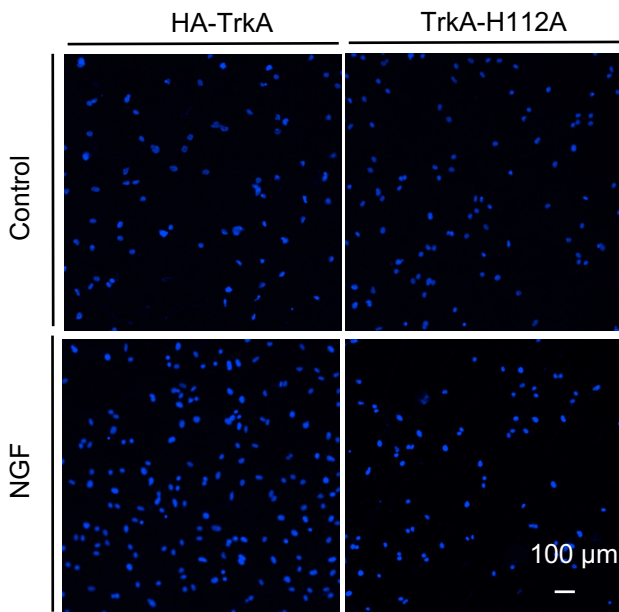**E**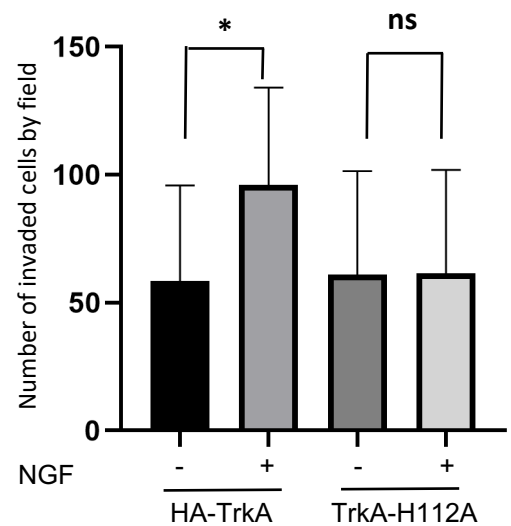Figure Supp 8, Trouvilliez *et al.*



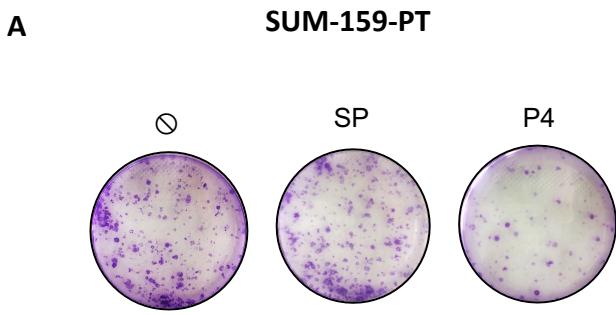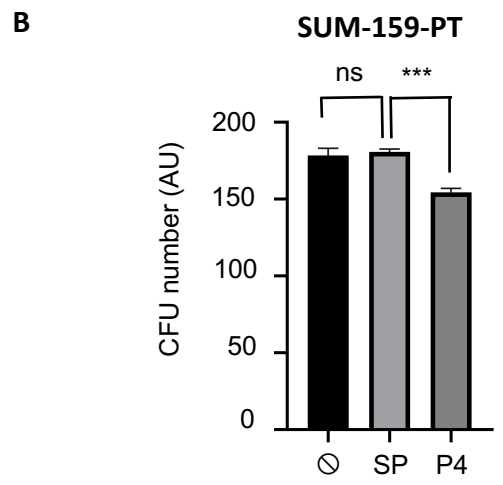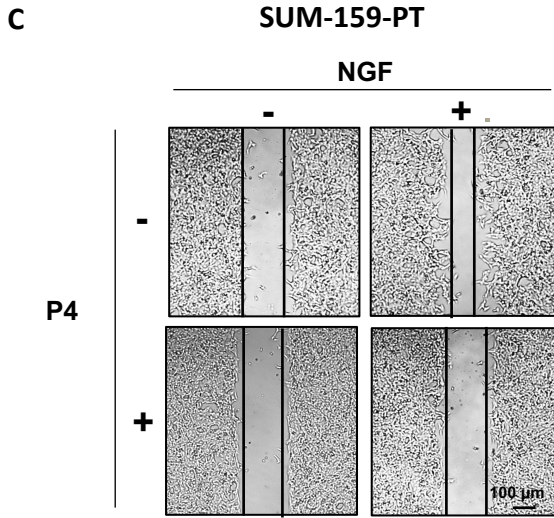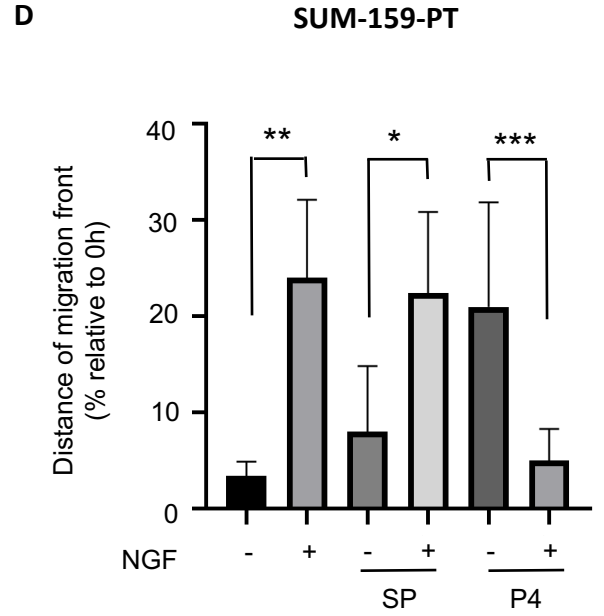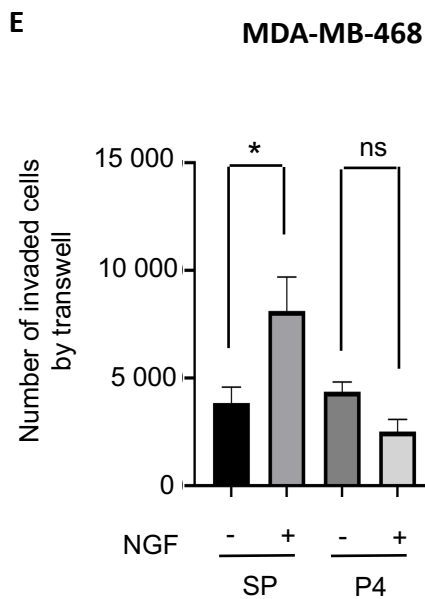

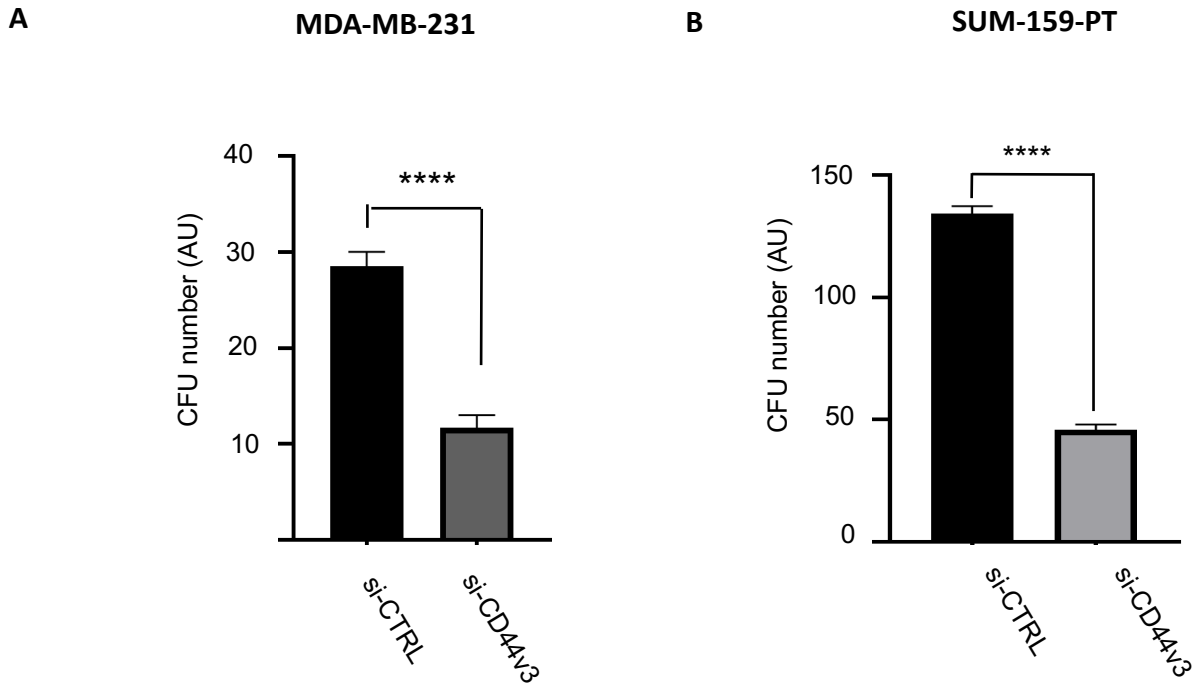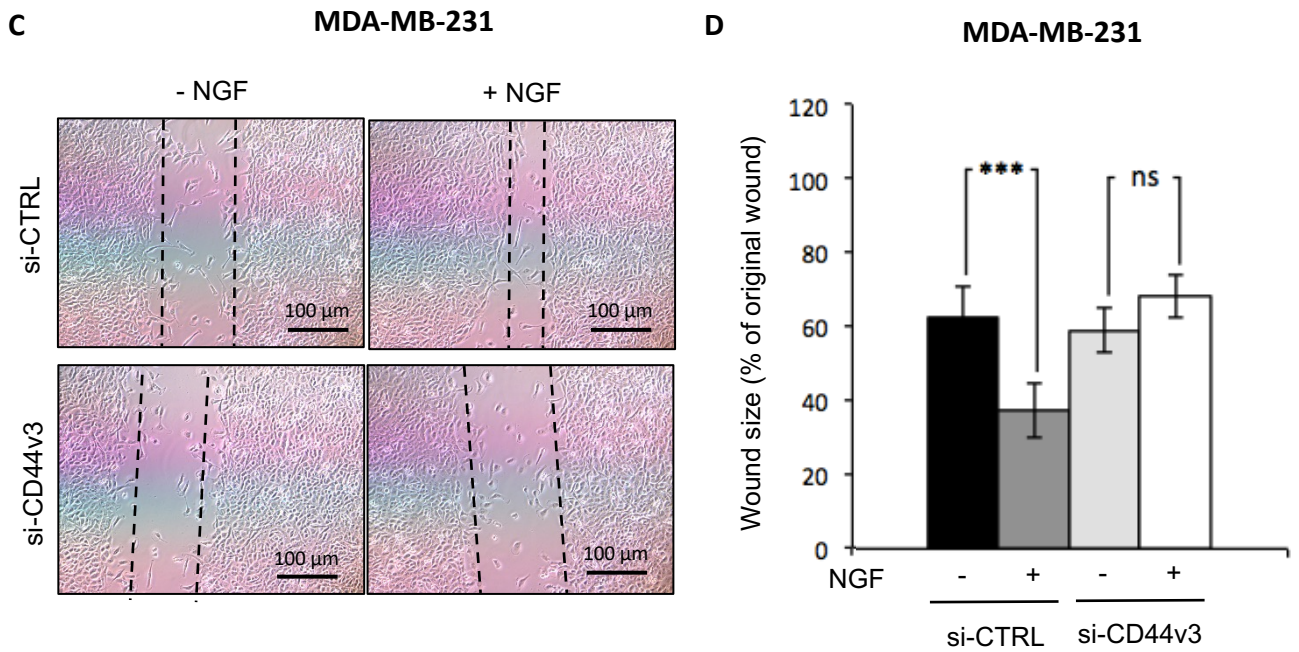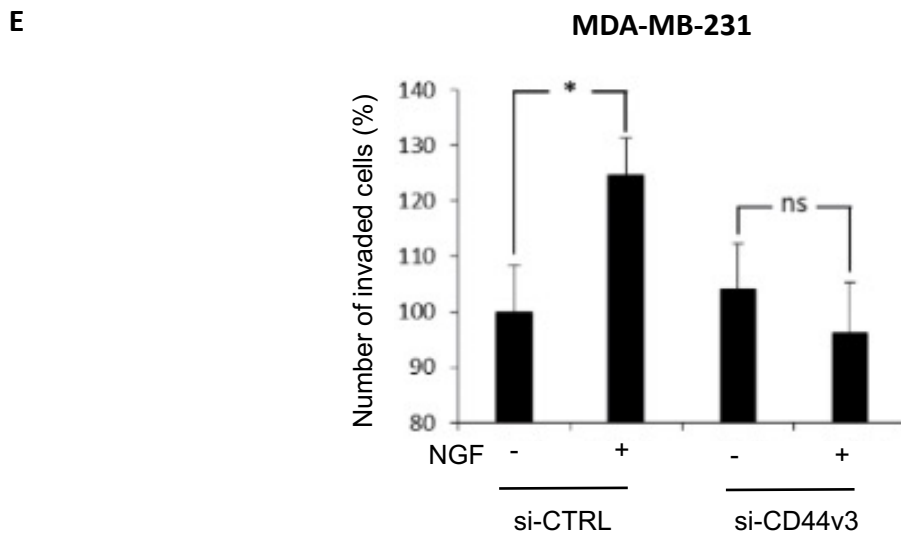

Figure Supp 10, Trouvilliez *et al.*

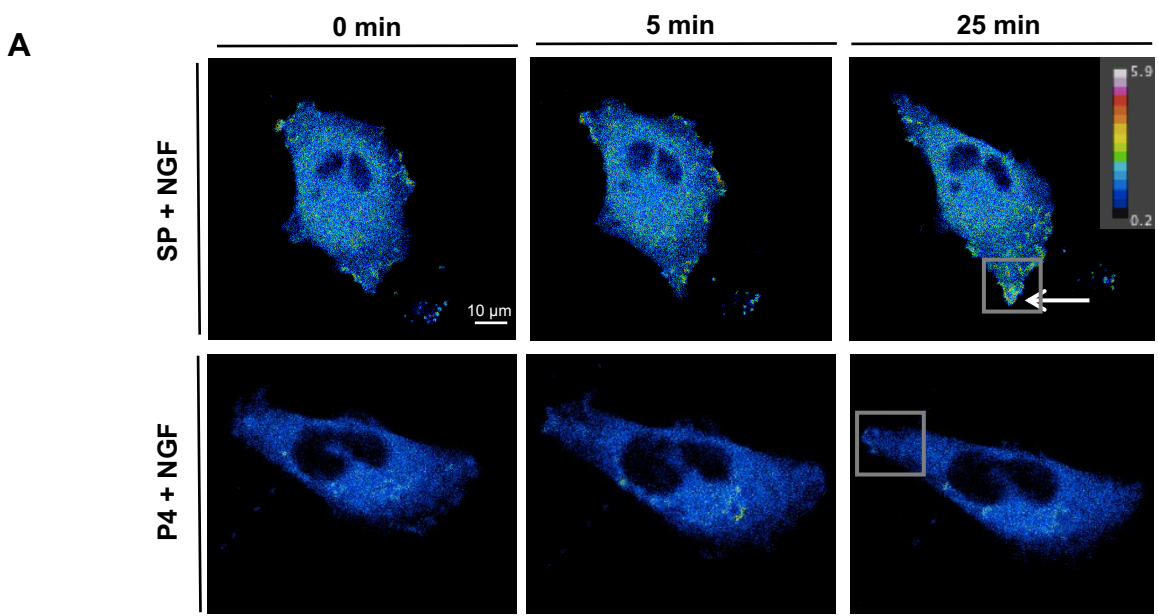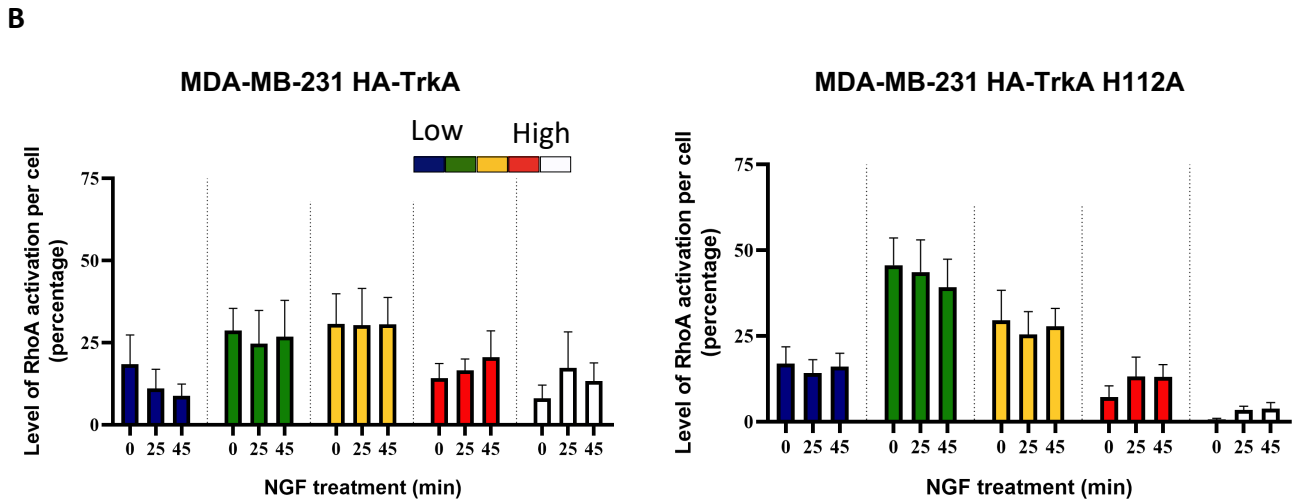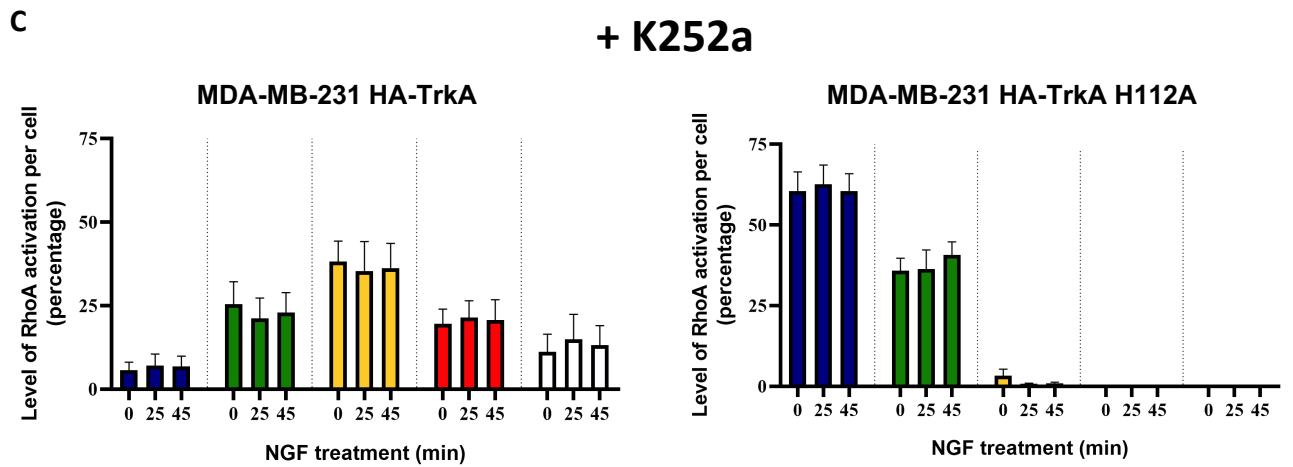

Figure Supp 11, Trouvilliez *et al.*
